# Supplementary material for: Solvophobicity-directed assembly of microporous molecular crystals
Source: PubMed Central journal article supplement (PMC9814291; doi:10.1038/s42004-021-00561-8), 2021-08-20
Supplement: 42004_2021_561_MOESM1_ESM.pdf [file 42004_2021_561_MOESM1_ESM.pdf]

## Supplementary Information

### Solvophobicity-directed assembly of microporous molecular crystals

**Hiroshi Yamagishi\***, **Monika Tsunoda**, **Kohei Iwai**, **Kowit Hengphasatporn**, **Yasuteru Shigeta**, **Hiroyasu Sato**, and **Yohei Yamamoto**

*Department of Materials Science, Faculty of Pure and Applied Sciences, and Tsukuba Research Center for Energy Materials Science (TREMS), University of Tsukuba, 1-1-1 Tennodai, Tsukuba, Ibaraki 305-8573, Japan.*

*Center for Computational Sciences, University of Tsukuba, 1-1-1 Tennodai, Tsukuba, Ibaraki 305-8577, Japan.*

*Rigaku Corporation, 12-9-3 Matsubara, Akishima, Tokyo 196-8666, Japan.*

\*Correspondence and requests for materials should be addressed to Hiroshi Yamagishi (yamagishi.hiroshi.ff@u.tsukuba.ac.jp).

## Table of Contents

|                                           |     |
|-------------------------------------------|-----|
| 1. Supplementary methods.....             | S3  |
| 2. Supplementary figures and tables ..... | S7  |
| 3. Supporting references .....            | S43 |

## 1. Supplementary methods

### Synthesis of *m*-Py<sub>6</sub>Mes and Ph<sub>6</sub>Mes

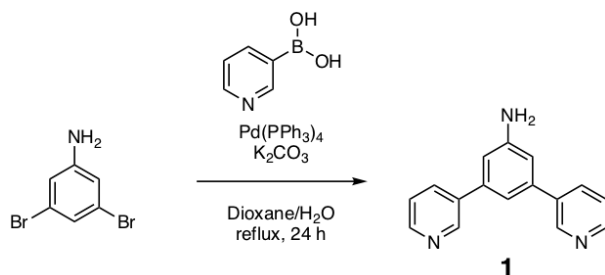

**Reaction procedure for 1:** To a Schlenk flask purged with dibromoaniline (850 mg), pyridine boronic acid (1.1 g), and K<sub>2</sub>CO<sub>3</sub> (2.6 g) in a mixture of degassed dioxane (30 mL) and H<sub>2</sub>O (7.5 mL) under N<sub>2</sub> gas was added Pd(PPh<sub>3</sub>)<sub>4</sub> (270 mg). The resulting solution was refluxed for 24 h. After cooling to ambient temperature, the resulting suspension was collected and dried under reduced pressure. The resultant crude was dissolved in CHCl<sub>3</sub> and extracted with aqueous solution of HCl. To the aqueous phase was added aqueous solution of NaOH dropwise until the extract was neutralized. Resultant precipitate was collected through cellulose filter and was dried under reduced pressure to yield **1** as brown solid (900 mg). The product was utilized for the next reaction without further purification. <sup>1</sup>H NMR (400 MHz, CDCl<sub>3</sub>): δ (ppm) 4.05 (s, 2H, NH<sub>2</sub>), 6.86 (s, 2H, Ar), 7.06 (s, 1H, Ar), 7.31 (dd, *J* = 4.4, 8.0 Hz, 2H, Ar), 7.83 (d, *J* = 8.0 Hz, 2H, Ar), 8.56 (d, *J* = 4.4 Hz, 2H, Ar), 8.80 (s, 2H, Ar).

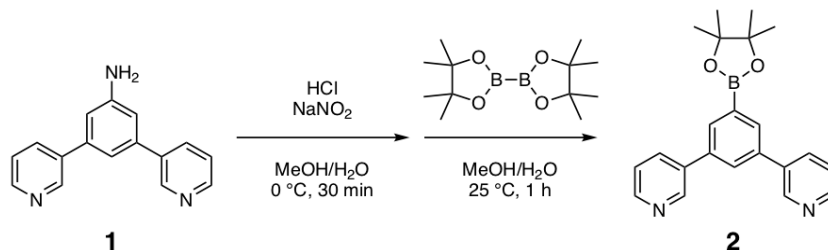

**Reaction procedure for 2:** To a round flask purged with **1** (250 mg) and HCl (262 mg) in a mixture of MeOH (2.0 mL) and H<sub>2</sub>O (1.8 mL) was added aqueous solution of NaNO<sub>2</sub> (0.5 mL, 2.2

M) dropwise at 0 °C. The mixture was stirred for 30 min at 0 °C under atmosphere. After being heated up to 25 °C, MeOH solution of bis(pinacolato)diboron (5.0 mL, 0.6 M) was added to the solution. The mixture was stirred at 25 °C for 60 min. The resultant solution was washed with CH<sub>2</sub>Cl<sub>2</sub>. The aqueous layer was neutralized with aqueous solution of NaHCO<sub>3</sub>, and the precipitate was collected through cellulose filter. The residue was purified on silica-gel column (CH<sub>2</sub>Cl<sub>2</sub>/MeOH = 95/5), and further purified with preparative GPC (eluent: CHCl<sub>3</sub>) to yield **2** as yellow solid (50 mg, 14%). <sup>1</sup>H NMR (400 MHz, CDCl<sub>3</sub>): δ (ppm) 1.36 (s, 12H, CH<sub>3</sub>), 7.37 (dd, *J* = 4.4, 8.0 Hz, 2H, Ar), 7.84 (t, *J* = 2.0 Hz, 1H, Ar), 7.95 (dt, *J* = 2.0, 8.0 Hz, 2H, Ar), 8.04 (d, *J* = 2.0 Hz, 2H, Ar), 8.60 (d, *J* = 3.6 Hz, 2H, Ar), 8.91 (s, 2H, Ar).

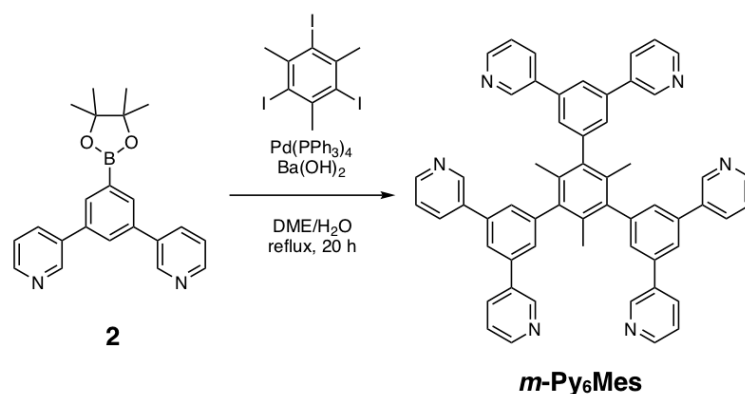

**Reaction procedure for *m*-Py<sub>6</sub>Mes:** To a Schlenk flask purged with N<sub>2</sub> was added **2** (32 mg), triiodomesitylene (9.8 mg) and Ba(OH)<sub>2</sub>•8H<sub>2</sub>O (28 mg) in a mixture of degassed dimethoxyethane (1.8 mL) and H<sub>2</sub>O (0.45 mL) under N<sub>2</sub> was added Pd(PPh<sub>3</sub>)<sub>4</sub> (6.0 mg). The resulting solution was refluxed for 20 h. The resulting suspension was collected and extracted with CH<sub>2</sub>Cl<sub>2</sub> for two times. The combined organic layer was dried under reduced pressure and was purified on silica-gel column (CH<sub>2</sub>Cl<sub>2</sub>/MeOH = 95/5), and further purified with preparative GPC (eluent: CHCl<sub>3</sub>) to yield ***m*-Py<sub>6</sub>Mes** as yellow solid (10.8 mg, 69%). <sup>1</sup>H NMR (400 MHz, CDCl<sub>3</sub>): δ (ppm) 1.94 (s, 9H, CH<sub>3</sub>), 7.39 (dd, *J* = 3.2, 5.2 Hz, 6H, Ar), 7.55 (d, *J* = 1.6 Hz, 6H, Ar), 7.78 (t, *J* = 1.6 Hz, 3H, Ar), 7.97 (dt, *J* = 2.0, 8.0 Hz, 6H, Ar), 8.62 (d, *J* = 2.0 Hz, 6H, Ar), 8.93 (d, *J* = 2.0 Hz, 6H, Ar), <sup>13</sup>C NMR (150 MHz, CDCl<sub>3</sub>): δ (ppm) 20.0, 123.7, 124.4, 127.8, 133.6, 134.5, 136.0, 139.2, 139.4,

143.5, 148.3, 148.9. HRMS (ESI-FTMS)  $m/z$ : calcd. for  $C_{57}H_{42}N_6$   $[M + H]^+$ : 811.3544; found: 811.3528.

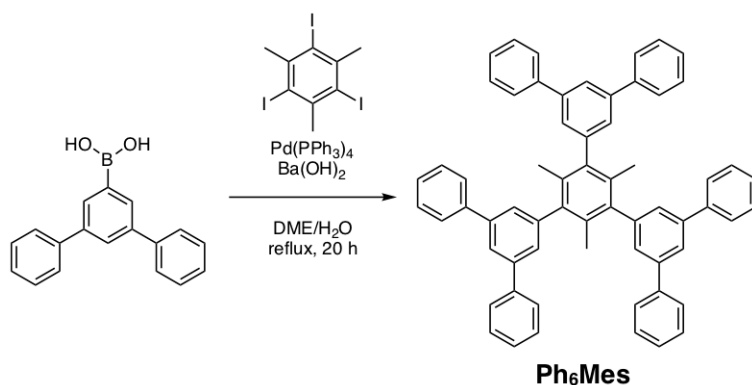

**Reaction procedure for Ph<sub>6</sub>Mes:** To a Schlenk flask purged with N<sub>2</sub> filled with dimethoxyethane (9.5 mL) and H<sub>2</sub>O (2.2 mL) was added Pd(PPh<sub>3</sub>)<sub>4</sub> (46 mg), 5'-*m*-terphenylboronic acid (300 mg), triiodomesitylene (97 mg) and Ba(OH)<sub>2</sub>•8H<sub>2</sub>O (307 mg) and was refluxed for 20 h. The resultant suspension was collected and extracted with CH<sub>2</sub>Cl<sub>2</sub> for two times. The combined organic layer was dried under reduced pressure and was purified on a silica-gel column (CHCl<sub>3</sub>/Hexane = 2/8) to yield **Ph<sub>6</sub>Mes** as white solid (130 mg, 83%). <sup>1</sup>H NMR (400 MHz, CDCl<sub>3</sub>): δ (ppm) 1.99 (s, 9H, CH<sub>3</sub>), 7.38 (t, *J* = 7.6 Hz, 6H, Ar), 7.48 (t, *J* = 7.6 Hz, 12H, Ar), 7.55 (d, *J* = 1.2 Hz, 6H, Ar), 7.72 (d, *J* = 7.6 Hz, 12H, Ar), 7.84 (t, *J* = 1.6 Hz, 3H, Ar), <sup>13</sup>C NMR (100 MHz, CDCl<sub>3</sub>): δ (ppm) 19.9, 124.2, 127.1, 127.2, 127.4, 128.8, 133.5, 139.9, 141.0, 141.9, 142.9; analysis (calcd., found for C<sub>63</sub>H<sub>48</sub>): C (93.99, 94.10), H (6.01, 5.88).

## 2. Supplementary figures and tables

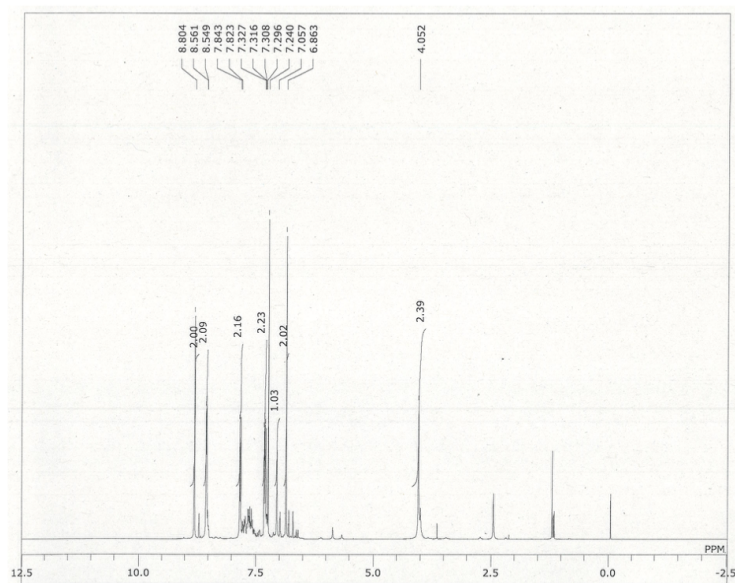

Supplementary Figure 1.  $^1\text{H}$  NMR spectrum of **1** ( $\text{CDCl}_3$ , 400 MHz).

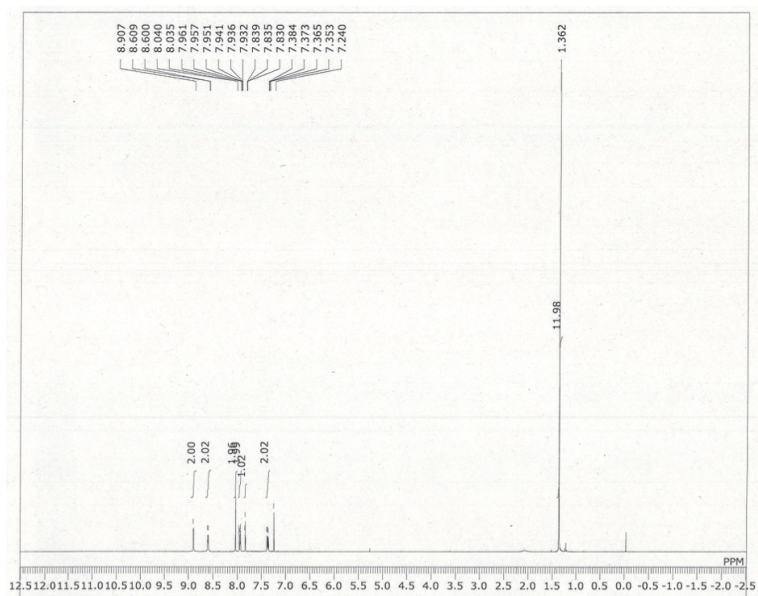

Supplementary Figure 2.  $^1\text{H}$  NMR spectrum of **2** ( $\text{CDCl}_3$ , 400 MHz).

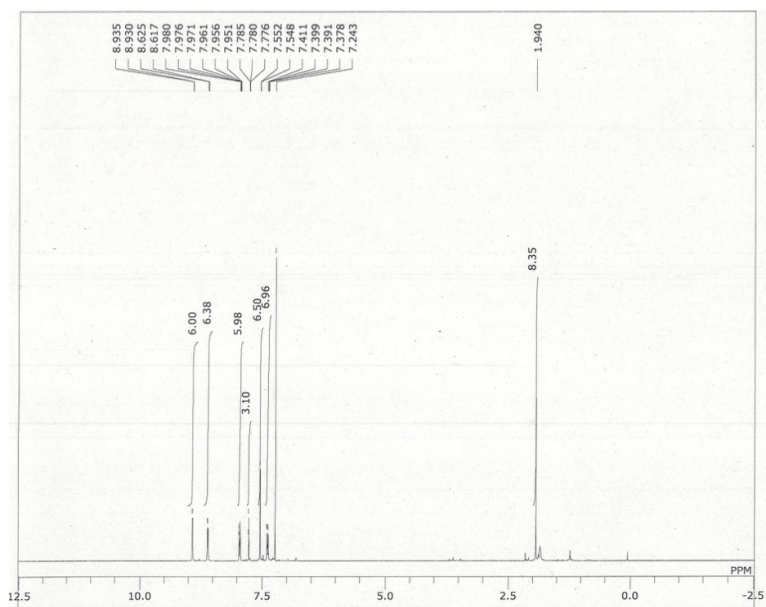

**Supplementary Figure 3.**  $^1\text{H}$  NMR spectrum of *m*-Py<sub>6</sub>Mes (CDCl<sub>3</sub>, 400 MHz).

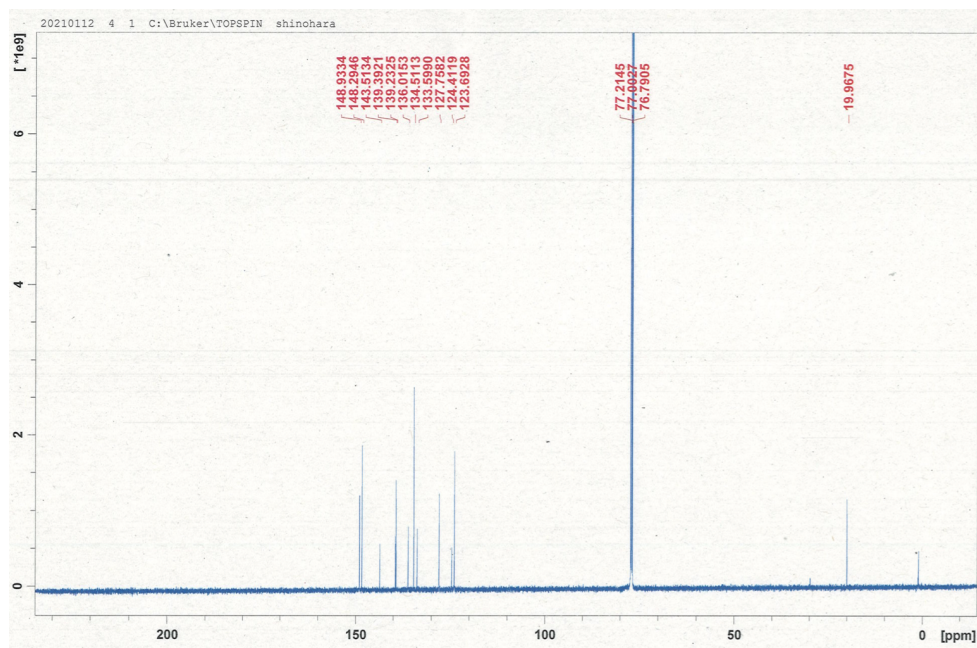

**Supplementary Figure 4.**  $^{13}\text{C}$  NMR spectrum of *m*-Py<sub>6</sub>Mes (CDCl<sub>3</sub>, 150 MHz).



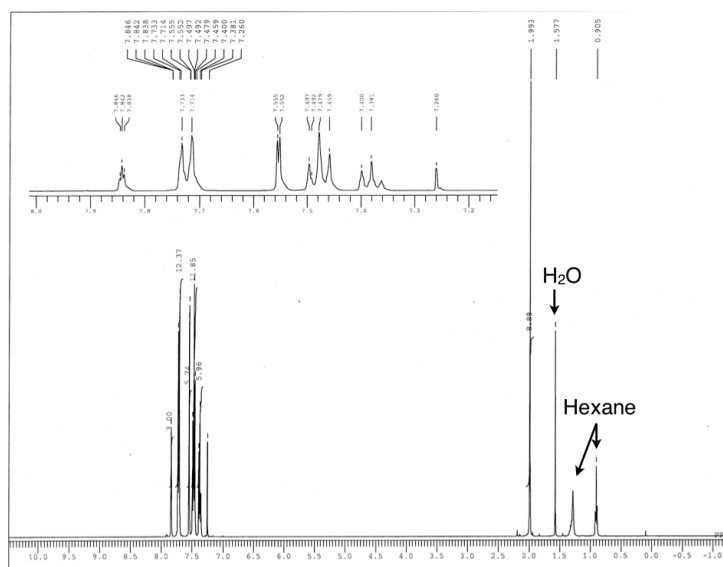

**Supplementary Figure 5.** <sup>1</sup>H NMR spectrum of **Ph<sub>6</sub>Mes** (CDCl<sub>3</sub>, 400 MHz).

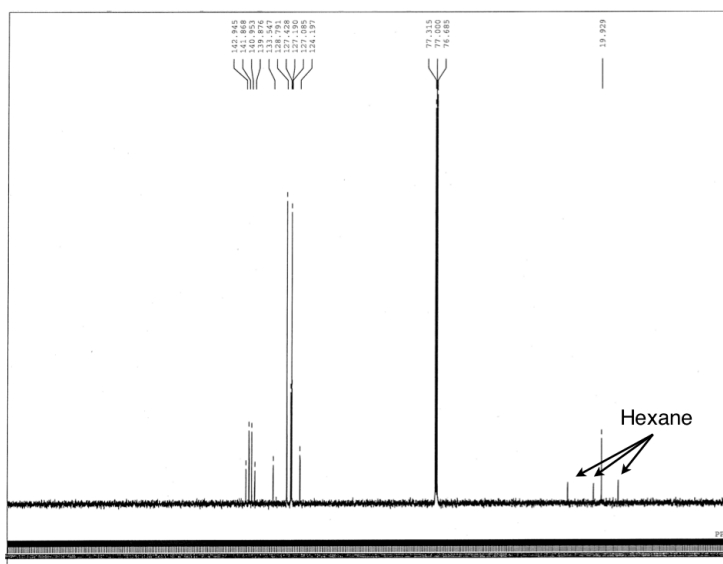

**Supplementary Figure 6.** <sup>13</sup>C NMR spectrum of **Ph<sub>6</sub>Mes** (CDCl<sub>3</sub>, 100 MHz).

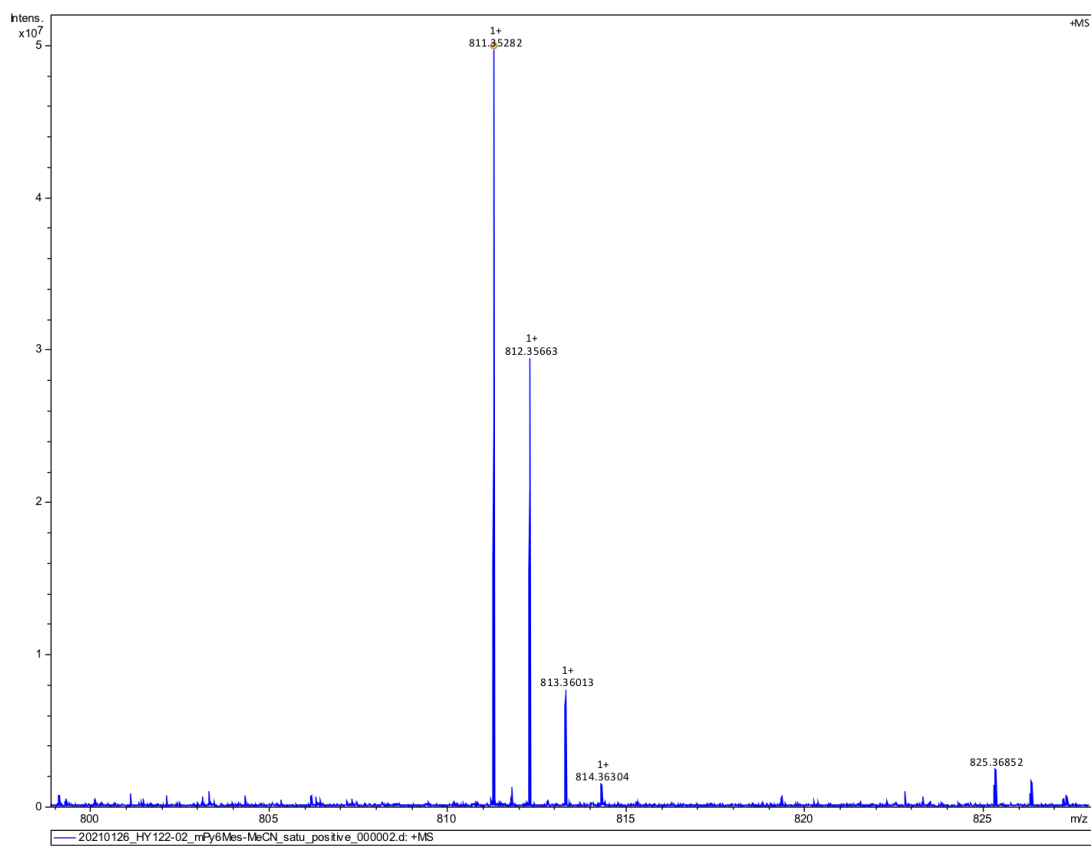

**Supplementary Figure 7.** High resolution ESI-FTMS of *m*-Py<sub>6</sub>Mes.

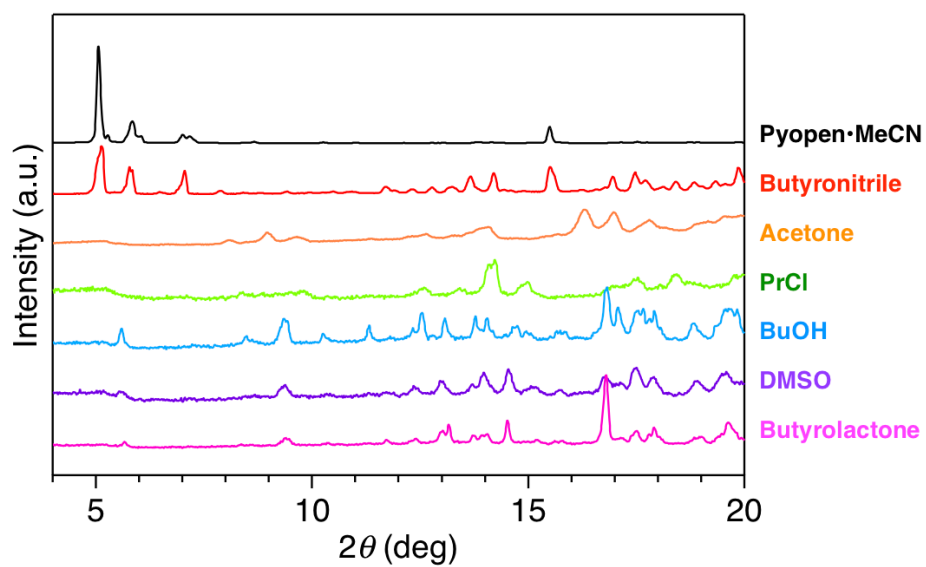

**Supplementary Figure 8.** Powder X-ray diffraction profiles of **Py<sub>6</sub>Mes** crystallized in MeCN (black), butyronitrile (red), acetone (orange), 1-chloropropane (green), 1-butanol (blue), dimethylsulfoxide (purple), and butyrolactone (pink).

**Supplementary Table 1.** Crystal structure information of **Py<sup>open</sup>•EtOAc**.

---

|                                                                                                                   |                                                |
|-------------------------------------------------------------------------------------------------------------------|------------------------------------------------|
| Crystal data                                                                                                      |                                                |
| Chemical formula                                                                                                  | C <sub>57</sub> H <sub>42</sub> N <sub>6</sub> |
| <i>M<sub>r</sub></i>                                                                                              | 811.00                                         |
| Crystal system, space group                                                                                       | Monoclinic, <i>P</i> 2 <sub>1</sub> / <i>c</i> |
| Temperature (K)                                                                                                   | 273                                            |
| <i>a</i> , <i>b</i> , <i>c</i> (Å)                                                                                | 17.206 (4), 10.531 (2), 30.275 (8)             |
| β (°)                                                                                                             | 99.893 (4)                                     |
| <i>V</i> (Å <sup>3</sup> )                                                                                        | 5404 (2)                                       |
| <i>Z</i>                                                                                                          | 4                                              |
| Radiation type                                                                                                    | Mo <i>K</i> α                                  |
| μ (mm <sup>-1</sup> )                                                                                             | 0.06                                           |
| Crystal size (mm)                                                                                                 | 0.30 × 0.24 × 0.23                             |
| Data collection                                                                                                   |                                                |
| Diffractometer                                                                                                    | Rigaku Saturn70                                |
| Absorption correction                                                                                             | Multi-scan<br>REQAB (Rigaku, 1998)             |
| <i>T<sub>min</sub></i> , <i>T<sub>max</sub></i>                                                                   | 0.519, 0.986                                   |
| No. of measured, independent and<br>observed [ <i>F</i> <sup>2</sup> > 2.0σ( <i>F</i> <sup>2</sup> )] reflections | 41071, 12237, 5901                             |
| <i>R<sub>int</sub></i>                                                                                            | 0.112                                          |
| (sin θ/λ) <sub>max</sub> (Å <sup>-1</sup> )                                                                       | 0.649                                          |
| Refinement                                                                                                        |                                                |
| <i>R</i> [ <i>F</i> <sup>2</sup> > 2σ( <i>F</i> <sup>2</sup> )], <i>wR</i> ( <i>F</i> <sup>2</sup> ), <i>S</i>    | 0.090, 0.301, 1.02                             |
| No. of reflections                                                                                                | 12237                                          |
| No. of parameters                                                                                                 | 571                                            |
| H-atom treatment                                                                                                  | H-atom parameters constrained                  |
| Δρ <sub>max</sub> , Δρ <sub>min</sub> (e Å <sup>-3</sup> )                                                        | 0.25, -0.28                                    |

---

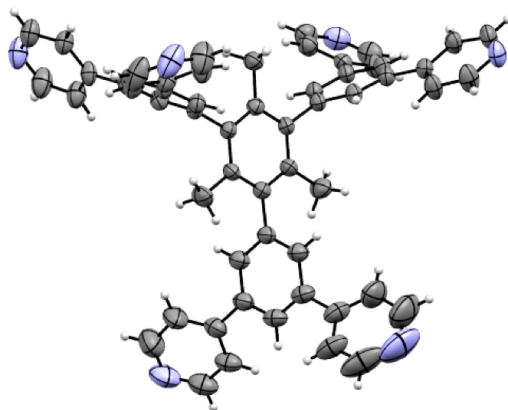

**Supplementary Figure 9.** An ORTEP diagram of  $\text{Py}^{\text{open}}\cdot\text{EtOAc}$  with a probability level of 50 %.

**Supplementary Table 2.** Crystal structure information of **Py<sup>VDW</sup>•CH<sub>2</sub>Cl<sub>2</sub>**.

---

|                                                                                                                   |                                                                                     |
|-------------------------------------------------------------------------------------------------------------------|-------------------------------------------------------------------------------------|
| Crystal data                                                                                                      |                                                                                     |
| Chemical formula                                                                                                  | C <sub>57</sub> H <sub>42</sub> N <sub>6</sub> •2(CH <sub>2</sub> Cl <sub>2</sub> ) |
| <i>M<sub>r</sub></i>                                                                                              | 980.86                                                                              |
| Crystal system, space group                                                                                       | Monoclinic, <i>C2/c</i>                                                             |
| Temperature (K)                                                                                                   | 93                                                                                  |
| <i>a</i> , <i>b</i> , <i>c</i> (Å)                                                                                | 16.946 (5), 12.865 (4), 22.452 (8)                                                  |
| β (°)                                                                                                             | 100.461 (4)                                                                         |
| <i>V</i> (Å <sup>3</sup> )                                                                                        | 4813 (3)                                                                            |
| <i>Z</i>                                                                                                          | 4                                                                                   |
| Radiation type                                                                                                    | Mo <i>K</i> α                                                                       |
| μ (mm <sup>-1</sup> )                                                                                             | 0.29                                                                                |
| Crystal size (mm)                                                                                                 | 0.40 × 0.35 × 0.15                                                                  |
|                                                                                                                   |                                                                                     |
| Data collection                                                                                                   |                                                                                     |
| Diffractometer                                                                                                    | Rigaku Saturn70                                                                     |
| Absorption correction                                                                                             | Multi-scan<br>REQAB (Rigaku, 1998)                                                  |
| <i>T<sub>min</sub></i> , <i>T<sub>max</sub></i>                                                                   | 0.849, 0.957                                                                        |
| No. of measured, independent and<br>observed [ <i>F</i> <sup>2</sup> > 2.0σ( <i>F</i> <sup>2</sup> )] reflections | 18352, 5432, 5175                                                                   |
| <i>R<sub>int</sub></i>                                                                                            | 0.033                                                                               |
| (sin θ/λ) <sub>max</sub> (Å <sup>-1</sup> )                                                                       | 0.648                                                                               |
|                                                                                                                   |                                                                                     |
| Refinement                                                                                                        |                                                                                     |
| <i>R</i> [ <i>F</i> <sup>2</sup> > 2σ( <i>F</i> <sup>2</sup> )], <i>wR</i> ( <i>F</i> <sup>2</sup> ), <i>S</i>    | 0.053, 0.131, 1.10                                                                  |
| No. of reflections                                                                                                | 5432                                                                                |
| No. of parameters                                                                                                 | 316                                                                                 |
| H-atom treatment                                                                                                  | H-atom parameters constrained                                                       |
| Δρ <sub>max</sub> , Δρ <sub>min</sub> (e Å <sup>-3</sup> )                                                        | 0.33, -0.46                                                                         |

---

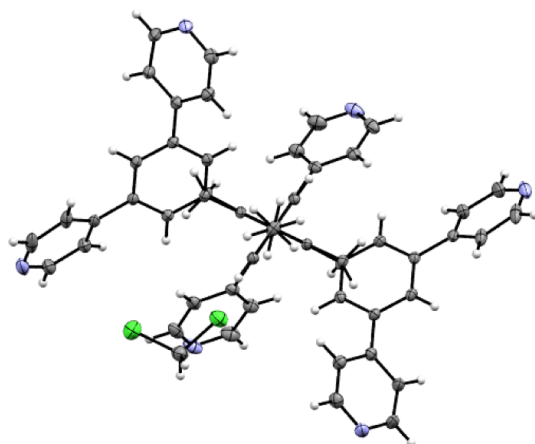

**Supplementary Figure 10.** An ORTEP diagram of  $\text{Py}^{\text{VDW}} \cdot \text{CH}_2\text{Cl}_2$  with a probability level of 50 %.

**Supplementary Table 3.** Crystal structure information of **Py<sup>VDW</sup>•C<sub>7</sub>H<sub>8</sub>**.

---

|                                                                                                                            |                                                                               |
|----------------------------------------------------------------------------------------------------------------------------|-------------------------------------------------------------------------------|
| Crystal data                                                                                                               |                                                                               |
| Chemical formula                                                                                                           | C <sub>57</sub> H <sub>42</sub> N <sub>6</sub> •C <sub>7</sub> H <sub>8</sub> |
| <i>M<sub>r</sub></i>                                                                                                       | 903.14                                                                        |
| Crystal system, space group                                                                                                | Triclinic, <i>P</i> $\bar{1}$                                                 |
| Temperature (K)                                                                                                            | 273                                                                           |
| <i>a</i> , <i>b</i> , <i>c</i> (Å)                                                                                         | 16.633 (5), 18.110 (6), 18.159 (6)                                            |
| $\alpha$ , $\beta$ , $\gamma$ (°)                                                                                          | 91.3845 (10), 106.522 (5), 110.295 (4)                                        |
| <i>V</i> (Å <sup>3</sup> )                                                                                                 | 4872 (3)                                                                      |
| <i>Z</i>                                                                                                                   | 4                                                                             |
| Radiation type                                                                                                             | Mo <i>K</i> $\alpha$                                                          |
| $\mu$ (mm <sup>-1</sup> )                                                                                                  | 0.07                                                                          |
| Crystal size (mm)                                                                                                          | 0.30 × 0.30 × 0.03                                                            |
| Data collection                                                                                                            |                                                                               |
| Diffractometer                                                                                                             | Rigaku Saturn70                                                               |
| Absorption correction                                                                                                      | Multi-scan<br>REQAB (Rigaku, 1998)                                            |
| <i>T<sub>min</sub></i> , <i>T<sub>max</sub></i>                                                                            | 0.841, 0.998                                                                  |
| No. of measured, independent and<br>observed [ <i>F</i> <sup>2</sup> > 2.0 $\sigma$ ( <i>F</i> <sup>2</sup> )] reflections | 41360, 21433, 16316                                                           |
| <i>R<sub>int</sub></i>                                                                                                     | 0.064                                                                         |
| ( <i>sin</i> $\theta$ / $\lambda$ ) <sub>max</sub> (Å <sup>-1</sup> )                                                      | 0.649                                                                         |
| Refinement                                                                                                                 |                                                                               |
| <i>R</i> [ <i>F</i> <sup>2</sup> > 2 $\sigma$ ( <i>F</i> <sup>2</sup> )], <i>wR</i> ( <i>F</i> <sup>2</sup> ), <i>S</i>    | 0.121, 0.296, 1.14                                                            |
| No. of reflections                                                                                                         | 21433                                                                         |
| No. of parameters                                                                                                          | 1269                                                                          |
| H-atom treatment                                                                                                           | H-atom parameters constrained                                                 |
| $\Delta\rho_{\max}$ , $\Delta\rho_{\min}$ (e Å <sup>-3</sup> )                                                             | 0.70, -0.44                                                                   |

---



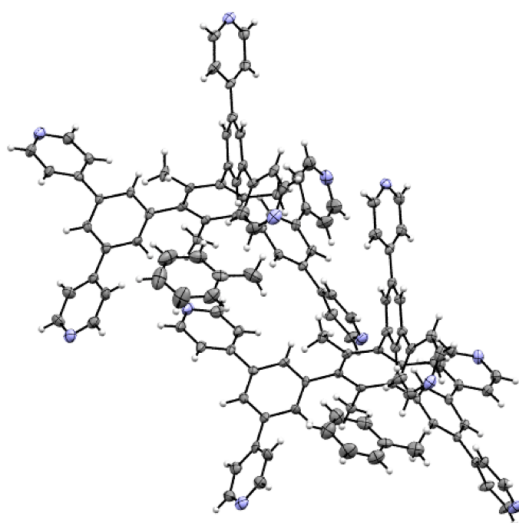

**Supplementary Figure 11.** An ORTEP diagram of  $\text{Py}^{\text{VDW}} \cdot \text{C}_7\text{H}_8$  with a probability level of 50 %.

**Supplementary Table 4.** Crystal structure information of *m*-Py<sup>VDW</sup>•MeCN.

---

|                                                                                                                         |                                                    |
|-------------------------------------------------------------------------------------------------------------------------|----------------------------------------------------|
| Crystal data                                                                                                            |                                                    |
| Chemical formula                                                                                                        | 2(C <sub>57</sub> H <sub>42</sub> N <sub>6</sub> ) |
| <i>M</i> <sub>r</sub>                                                                                                   | 1621.93                                            |
| Crystal system, space group                                                                                             | Triclinic, <i>P</i> $\bar{1}$                      |
| Temperature (K)                                                                                                         | 93                                                 |
| <i>a</i> , <i>b</i> , <i>c</i> (Å)                                                                                      | 11.701, 19.241, 21.820                             |
| $\alpha$ , $\beta$ , $\gamma$ (°)                                                                                       | 107.22, 104.21, 104.14                             |
| <i>V</i> (Å <sup>3</sup> )                                                                                              | 4273.9                                             |
| <i>Z</i>                                                                                                                | 2                                                  |
| Radiation type                                                                                                          | Mo <i>K</i> $\alpha$                               |
| $\mu$ (mm <sup>-1</sup> )                                                                                               | 0.08                                               |
| Crystal size (mm)                                                                                                       | 150 × 120 × 100                                    |
| Data collection                                                                                                         |                                                    |
| Diffractometer                                                                                                          | Bruker <i>SMART APEX2</i> area detector            |
| Absorption correction                                                                                                   | Multi-scan                                         |
| <i>T</i> <sub>min</sub> , <i>T</i> <sub>max</sub>                                                                       | 0.660, 0.746                                       |
| No. of measured, independent and observed [ <i>I</i> > 2 $\sigma$ ( <i>I</i> )] reflections                             | 24683, 18637, 14834                                |
| <i>R</i> <sub>int</sub>                                                                                                 | 0.014                                              |
| ( <i>sin</i> $\theta$ / $\lambda$ ) <sub>max</sub> (Å <sup>-1</sup> )                                                   | 0.649                                              |
| Refinement                                                                                                              |                                                    |
| <i>R</i> [ <i>F</i> <sup>2</sup> > 2 $\sigma$ ( <i>F</i> <sup>2</sup> )], <i>wR</i> ( <i>F</i> <sup>2</sup> ), <i>S</i> | 0.045, 0.122, 1.03                                 |
| No. of reflections                                                                                                      | 18637                                              |
| No. of parameters                                                                                                       | 1141                                               |
| H-atom treatment                                                                                                        | H-atom parameters constrained                      |
| $\Delta\rho$ <sub>max</sub> , $\Delta\rho$ <sub>min</sub> (e Å <sup>-3</sup> )                                          | 0.35, -0.26                                        |

---

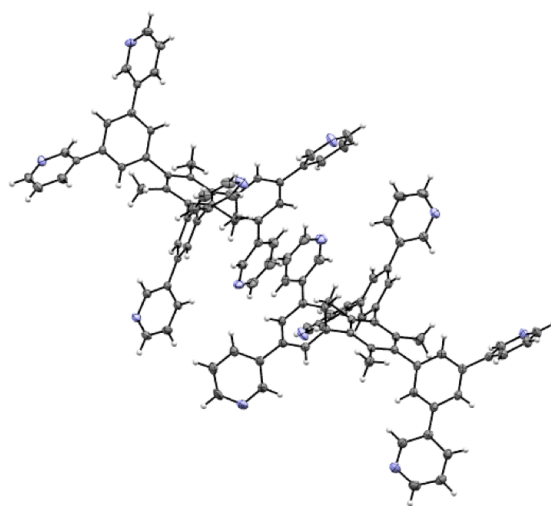

**Supplementary Figure 12.** An ORTEP diagram of *m*-Py<sup>VDW</sup>•MeCN with a probability level of 50 %.

**Supplementary Table 5.** Crystal structure information of *m*-Py<sup>VDW</sup>•EtOAc.

---

|                                                                                                                         |                                                                                                                                                                                                                                                                |
|-------------------------------------------------------------------------------------------------------------------------|----------------------------------------------------------------------------------------------------------------------------------------------------------------------------------------------------------------------------------------------------------------|
| Crystal data                                                                                                            |                                                                                                                                                                                                                                                                |
| Chemical formula                                                                                                        | 2(C <sub>57</sub> H <sub>42</sub> N <sub>6</sub> )                                                                                                                                                                                                             |
| <i>M</i> <sub>r</sub>                                                                                                   | 1621.93                                                                                                                                                                                                                                                        |
| Crystal system, space group                                                                                             | Triclinic, <i>P</i> $\bar{1}$                                                                                                                                                                                                                                  |
| Temperature (K)                                                                                                         | 93                                                                                                                                                                                                                                                             |
| <i>a</i> , <i>b</i> , <i>c</i> (Å)                                                                                      | 11.6490 (13), 19.114 (2), 21.707 (2)                                                                                                                                                                                                                           |
| $\alpha$ , $\beta$ , $\gamma$ (°)                                                                                       | 107.133 (2), 104.165 (2), 104.290 (2)                                                                                                                                                                                                                          |
| <i>V</i> (Å <sup>3</sup> )                                                                                              | 4204.7 (8)                                                                                                                                                                                                                                                     |
| <i>Z</i>                                                                                                                | 2                                                                                                                                                                                                                                                              |
| Radiation type                                                                                                          | Mo <i>K</i> $\alpha$                                                                                                                                                                                                                                           |
| $\mu$ (mm <sup>-1</sup> )                                                                                               | 0.08                                                                                                                                                                                                                                                           |
| Crystal size (mm)                                                                                                       | 90 × 60 × 10                                                                                                                                                                                                                                                   |
| Data collection                                                                                                         |                                                                                                                                                                                                                                                                |
| Diffractometer                                                                                                          | Bruker <i>SMART APEX2</i> area detector                                                                                                                                                                                                                        |
| Absorption correction                                                                                                   | Multi-scan<br><i>SADABS2016/2</i> (Bruker,2016/2) was used for absorption correction. <i>wR2(int)</i> was 0.0867 before and 0.0415 after correction. The Ratio of minimum to maximum transmission is 0.8898. The $\lambda/2$ correction factor is Not present. |
| <i>T</i> <sub>min</sub> , <i>T</i> <sub>max</sub>                                                                       | 0.663, 0.745                                                                                                                                                                                                                                                   |
| No. of measured, independent and observed [ <i>I</i> > 2 $\sigma$ ( <i>I</i> )] reflections                             | 22155, 16095, 7307                                                                                                                                                                                                                                             |
| <i>R</i> <sub>int</sub>                                                                                                 | 0.046                                                                                                                                                                                                                                                          |
| ( <i>sin</i> $\theta$ / $\lambda$ ) <sub>max</sub> (Å <sup>-1</sup> )                                                   | 0.616                                                                                                                                                                                                                                                          |
| Refinement                                                                                                              |                                                                                                                                                                                                                                                                |
| <i>R</i> [ <i>F</i> <sup>2</sup> > 2 $\sigma$ ( <i>F</i> <sup>2</sup> )], <i>wR</i> ( <i>F</i> <sup>2</sup> ), <i>S</i> | 0.072, 0.203, 0.97                                                                                                                                                                                                                                             |
| No. of reflections                                                                                                      | 16095                                                                                                                                                                                                                                                          |
| No. of parameters                                                                                                       | 1141                                                                                                                                                                                                                                                           |
| H-atom treatment                                                                                                        | H-atom parameters constrained                                                                                                                                                                                                                                  |
| $\Delta\rho$ <sub>max</sub> , $\Delta\rho$ <sub>min</sub> (e Å <sup>-3</sup> )                                          | 0.46, -0.26                                                                                                                                                                                                                                                    |

---

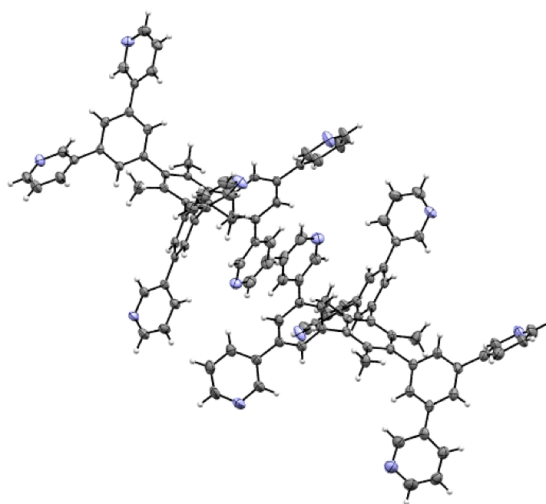

**Supplementary Figure 13.** An ORTEP diagram of *m*-Py<sup>VDW</sup>•EtOAc with a probability level of 50 %.

**Supplementary Table 6.** Crystal structure information of *m*-Py<sup>VDW</sup>•*i*PA.

---

|                                                                                                                         |                                                                                                                                                                                              |
|-------------------------------------------------------------------------------------------------------------------------|----------------------------------------------------------------------------------------------------------------------------------------------------------------------------------------------|
| Crystal data                                                                                                            |                                                                                                                                                                                              |
| Chemical formula                                                                                                        | C <sub>57</sub> H <sub>42</sub> N <sub>6</sub> ·2(C <sub>3</sub> H <sub>8</sub> O)                                                                                                           |
| <i>M</i> <sub>r</sub>                                                                                                   | 931.15                                                                                                                                                                                       |
| Crystal system, space group                                                                                             | Triclinic, <i>P</i> $\bar{1}$                                                                                                                                                                |
| Temperature (K)                                                                                                         | 93                                                                                                                                                                                           |
| <i>a</i> , <i>b</i> , <i>c</i> (Å)                                                                                      | 9.5699 (3), 15.0232 (5), 19.3749 (7)                                                                                                                                                         |
| $\alpha$ , $\beta$ , $\gamma$ (°)                                                                                       | 68.846 (3), 85.113 (3), 79.339 (3)                                                                                                                                                           |
| <i>V</i> (Å <sup>3</sup> )                                                                                              | 2552.48 (16)                                                                                                                                                                                 |
| <i>Z</i>                                                                                                                | 2                                                                                                                                                                                            |
| Radiation type                                                                                                          | Cu <i>K</i> $\alpha$                                                                                                                                                                         |
| $\mu$ (mm <sup>-1</sup> )                                                                                               | 0.58                                                                                                                                                                                         |
| Crystal size (mm)                                                                                                       | 300.0 × 100.0 × 10.0                                                                                                                                                                         |
| Data collection                                                                                                         |                                                                                                                                                                                              |
| Diffractionmeter                                                                                                        | Rigaku XtaLAB P200                                                                                                                                                                           |
| Absorption correction                                                                                                   | Multi-scan<br><i>CrysAlis PRO</i> 1.171.40.72a (Rigaku Oxford Diffraction, 2020) Empirical absorption correction using spherical harmonics, implemented in SCALE3 ABSPACK scaling algorithm. |
| <i>T</i> <sub>min</sub> , <i>T</i> <sub>max</sub>                                                                       | 0.599, 1.000                                                                                                                                                                                 |
| No. of measured, independent and observed [ <i>I</i> > 2 $\sigma$ ( <i>I</i> )] reflections                             | 28129, 9733, 8498                                                                                                                                                                            |
| <i>R</i> <sub>int</sub>                                                                                                 | 0.068                                                                                                                                                                                        |
| (sin $\theta/\lambda$ ) <sub>max</sub> (Å <sup>-1</sup> )                                                               | 0.619                                                                                                                                                                                        |
| Refinement                                                                                                              |                                                                                                                                                                                              |
| <i>R</i> [ <i>F</i> <sup>2</sup> > 2 $\sigma$ ( <i>F</i> <sup>2</sup> )], <i>wR</i> ( <i>F</i> <sup>2</sup> ), <i>S</i> | 0.082, 0.235, 1.05                                                                                                                                                                           |
| No. of reflections                                                                                                      | 9733                                                                                                                                                                                         |
| No. of parameters                                                                                                       | 823                                                                                                                                                                                          |
| H-atom treatment                                                                                                        | H atoms treated by a mixture of independent and constrained refinement                                                                                                                       |
| $\Delta\rho_{\max}$ , $\Delta\rho_{\min}$ (e Å <sup>-3</sup> )                                                          | 0.90, -0.69                                                                                                                                                                                  |

---

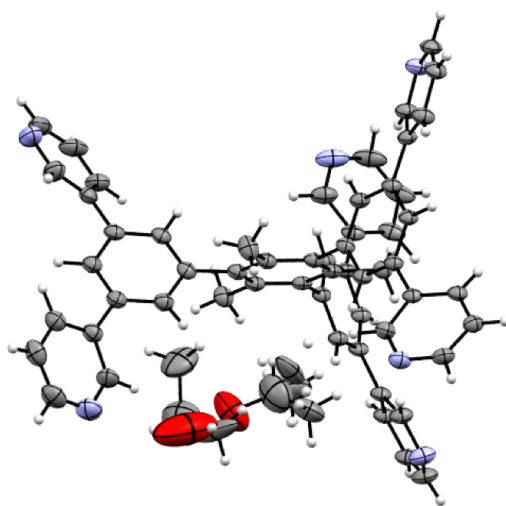

**Supplementary Figure 14.** An ORTEP diagram of *m*-Py<sup>VDW</sup>·*i*PA with a probability level of 50 %.

**Supplementary Table 7.** Crystal structure information of *m*-Py<sup>VDW</sup>•CHCl<sub>3</sub>.

---

|                                                                                                                |                                                                                                                                                                                                                                                        |
|----------------------------------------------------------------------------------------------------------------|--------------------------------------------------------------------------------------------------------------------------------------------------------------------------------------------------------------------------------------------------------|
| Crystal data                                                                                                   |                                                                                                                                                                                                                                                        |
| Chemical formula                                                                                               | 2(CHCl <sub>3</sub> )·C <sub>57</sub> H <sub>42</sub> N <sub>6</sub>                                                                                                                                                                                   |
| <i>M</i> <sub>r</sub>                                                                                          | 1049.70                                                                                                                                                                                                                                                |
| Crystal system, space group                                                                                    | Monoclinic, <i>P</i> 2 <sub>1</sub> / <i>n</i>                                                                                                                                                                                                         |
| Temperature (K)                                                                                                | 93                                                                                                                                                                                                                                                     |
| <i>a</i> , <i>b</i> , <i>c</i> (Å)                                                                             | 11.5262 (8), 25.3574 (17), 17.7834 (12)                                                                                                                                                                                                                |
| β (°)                                                                                                          | 102.282 (1)                                                                                                                                                                                                                                            |
| <i>V</i> (Å <sup>3</sup> )                                                                                     | 5078.7 (6)                                                                                                                                                                                                                                             |
| <i>Z</i>                                                                                                       | 4                                                                                                                                                                                                                                                      |
| Radiation type                                                                                                 | Mo <i>K</i> α                                                                                                                                                                                                                                          |
| μ (mm <sup>-1</sup> )                                                                                          | 0.39                                                                                                                                                                                                                                                   |
| Crystal size (mm)                                                                                              | 80 × 20 × 10                                                                                                                                                                                                                                           |
| Data collection                                                                                                |                                                                                                                                                                                                                                                        |
| Diffractometer                                                                                                 | Bruker <i>SMART APEX2</i> area detector                                                                                                                                                                                                                |
| Absorption correction                                                                                          | Multi-scan<br><i>SADABS2016/2</i> (Bruker,2016/2) was used for absorption correction. <i>wR2(int)</i> was 0.0509 before and 0.0309 after correction. The Ratio of minimum to maximum transmission is 0.9184. The λ/2 correction factor is Not present. |
| <i>T</i> <sub>min</sub> , <i>T</i> <sub>max</sub>                                                              | 0.684, 0.745                                                                                                                                                                                                                                           |
| No. of measured, independent and observed [ <i>I</i> > 2σ( <i>I</i> )] reflections                             | 25397, 9395, 6793                                                                                                                                                                                                                                      |
| <i>R</i> <sub>int</sub>                                                                                        | 0.038                                                                                                                                                                                                                                                  |
| (sin θ/λ) <sub>max</sub> (Å <sup>-1</sup> )                                                                    | 0.605                                                                                                                                                                                                                                                  |
| Refinement                                                                                                     |                                                                                                                                                                                                                                                        |
| <i>R</i> [ <i>F</i> <sup>2</sup> > 2σ( <i>F</i> <sup>2</sup> )], <i>wR</i> ( <i>F</i> <sup>2</sup> ), <i>S</i> | 0.045, 0.116, 1.01                                                                                                                                                                                                                                     |
| No. of reflections                                                                                             | 9395                                                                                                                                                                                                                                                   |
| No. of parameters                                                                                              | 671                                                                                                                                                                                                                                                    |
| H-atom treatment                                                                                               | H-atom parameters constrained                                                                                                                                                                                                                          |
| Δρ <sub>max</sub> , Δρ <sub>min</sub> (e Å <sup>-3</sup> )                                                     | 0.56, -0.53                                                                                                                                                                                                                                            |

---



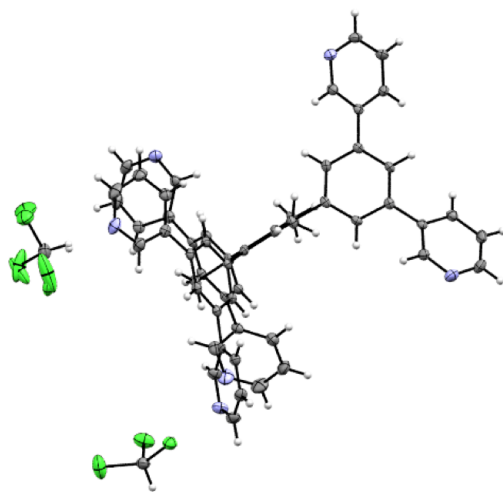

**Supplementary Figure 15.** An ORTEP diagram of *m*-Py<sup>VDW</sup>•CHCl<sub>3</sub> with a probability level of 50 %.

**Supplementary Table 8.** Crystal structure information of **Ph<sup>VDW</sup>•MeCN**.

---

|                                                                                                                         |                                                                                                                                                                                               |
|-------------------------------------------------------------------------------------------------------------------------|-----------------------------------------------------------------------------------------------------------------------------------------------------------------------------------------------|
| Crystal data                                                                                                            |                                                                                                                                                                                               |
| Chemical formula                                                                                                        | C <sub>63</sub> H <sub>48</sub>                                                                                                                                                               |
| <i>M<sub>r</sub></i>                                                                                                    | 805.01                                                                                                                                                                                        |
| Crystal system, space group                                                                                             | Triclinic, <i>P</i> $\bar{1}$                                                                                                                                                                 |
| Temperature (K)                                                                                                         | 100                                                                                                                                                                                           |
| <i>a</i> , <i>b</i> , <i>c</i> (Å)                                                                                      | 10.1054 (1), 11.3531 (2), 40.4637 (4)                                                                                                                                                         |
| $\alpha$ , $\beta$ , $\gamma$ (°)                                                                                       | 93.305 (1), 90.584 (1), 110.178 (1)                                                                                                                                                           |
| <i>V</i> (Å <sup>3</sup> )                                                                                              | 4347.90 (10)                                                                                                                                                                                  |
| <i>Z</i>                                                                                                                | 4                                                                                                                                                                                             |
| Radiation type                                                                                                          | Cu <i>K</i> $\alpha$                                                                                                                                                                          |
| $\mu$ (mm <sup>-1</sup> )                                                                                               | 0.52                                                                                                                                                                                          |
| Crystal size (mm)                                                                                                       | 0.50 × 0.10 × 0.02                                                                                                                                                                            |
| Data collection                                                                                                         |                                                                                                                                                                                               |
| Diffractometer                                                                                                          | Rigaku XtaLAB Synergy-Custom                                                                                                                                                                  |
| Absorption correction                                                                                                   | Multi-scan<br><i>CrysAlis PRO</i> 1.171.41.110a (Rigaku Oxford Diffraction, 2021) Empirical absorption correction using spherical harmonics, implemented in SCALE3 ABSPACK scaling algorithm. |
| <i>T<sub>min</sub></i> , <i>T<sub>max</sub></i>                                                                         | 0.446, 1.000                                                                                                                                                                                  |
| No. of measured, independent and observed [ <i>I</i> > 2 $\sigma$ ( <i>I</i> )] reflections                             | 55079, 17073, 14291                                                                                                                                                                           |
| <i>R<sub>int</sub></i>                                                                                                  | 0.044                                                                                                                                                                                         |
| ( <i>sin</i> $\theta$ / $\lambda$ ) <sub>max</sub> (Å <sup>-1</sup> )                                                   | 0.626                                                                                                                                                                                         |
| Refinement                                                                                                              |                                                                                                                                                                                               |
| <i>R</i> [ <i>F</i> <sup>2</sup> > 2 $\sigma$ ( <i>F</i> <sup>2</sup> )], <i>wR</i> ( <i>F</i> <sup>2</sup> ), <i>S</i> | 0.047, 0.131, 1.05                                                                                                                                                                            |
| No. of reflections                                                                                                      | 17073                                                                                                                                                                                         |
| No. of parameters                                                                                                       | 1141                                                                                                                                                                                          |
| H-atom treatment                                                                                                        | H-atom parameters constrained                                                                                                                                                                 |
| $\Delta\rho_{\max}$ , $\Delta\rho_{\min}$ (e Å <sup>-3</sup> )                                                          | 0.29, -0.34                                                                                                                                                                                   |

---

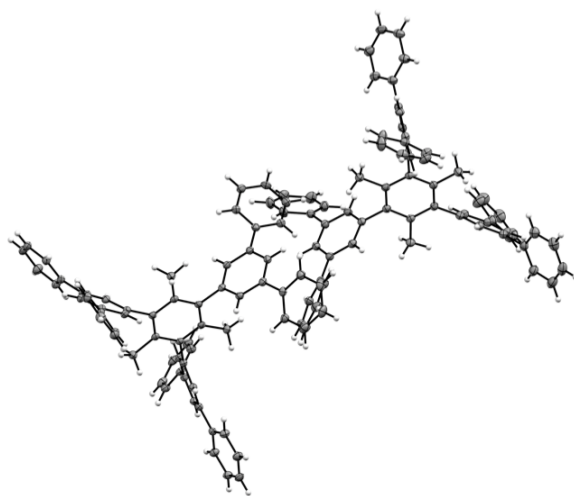

**Supplementary Figure 16.** An ORTEP diagram of **Ph<sup>VDW</sup>•MeCN** with a probability level of 50 %.

**Supplementary Table 9.** Crystal structure information of **Ph<sup>VDW</sup>•EtOAc**.

---

|                                                                                                                         |                                                                                                                                                                                               |
|-------------------------------------------------------------------------------------------------------------------------|-----------------------------------------------------------------------------------------------------------------------------------------------------------------------------------------------|
| Crystal data                                                                                                            |                                                                                                                                                                                               |
| Chemical formula                                                                                                        | C <sub>63</sub> H <sub>48</sub> ·C <sub>4</sub> H <sub>8</sub> O <sub>2</sub>                                                                                                                 |
| <i>M<sub>r</sub></i>                                                                                                    | 893.11                                                                                                                                                                                        |
| Crystal system, space group                                                                                             | Triclinic, <i>P</i> $\bar{1}$                                                                                                                                                                 |
| Temperature (K)                                                                                                         | 100                                                                                                                                                                                           |
| <i>a</i> , <i>b</i> , <i>c</i> (Å)                                                                                      | 11.2338 (2), 14.5022 (3), 17.3472 (3)                                                                                                                                                         |
| $\alpha$ , $\beta$ , $\gamma$ (°)                                                                                       | 70.282 (2), 80.554 (2), 68.644 (2)                                                                                                                                                            |
| <i>V</i> (Å <sup>3</sup> )                                                                                              | 2474.99 (9)                                                                                                                                                                                   |
| <i>Z</i>                                                                                                                | 2                                                                                                                                                                                             |
| Radiation type                                                                                                          | Cu <i>K</i> $\alpha$                                                                                                                                                                          |
| $\mu$ (mm <sup>-1</sup> )                                                                                               | 0.54                                                                                                                                                                                          |
| Crystal size (mm)                                                                                                       | 0.45 × 0.28 × 0.22                                                                                                                                                                            |
| Data collection                                                                                                         |                                                                                                                                                                                               |
| Diffractometer                                                                                                          | Rigaku XtaLAB Synergy-Custom                                                                                                                                                                  |
| Absorption correction                                                                                                   | Multi-scan<br><i>CrysAlis PRO</i> 1.171.41.110a (Rigaku Oxford Diffraction, 2021) Empirical absorption correction using spherical harmonics, implemented in SCALE3 ABSPACK scaling algorithm. |
| <i>T<sub>min</sub></i> , <i>T<sub>max</sub></i>                                                                         | 0.649, 1.000                                                                                                                                                                                  |
| No. of measured, independent and observed [ <i>I</i> > 2 $\sigma$ ( <i>I</i> )] reflections                             | 28171, 9732, 8656                                                                                                                                                                             |
| <i>R<sub>int</sub></i>                                                                                                  | 0.065                                                                                                                                                                                         |
| ( <i>sin</i> $\theta$ / $\lambda$ ) <sub>max</sub> (Å <sup>-1</sup> )                                                   | 0.626                                                                                                                                                                                         |
| Refinement                                                                                                              |                                                                                                                                                                                               |
| <i>R</i> [ <i>F</i> <sup>2</sup> > 2 $\sigma$ ( <i>F</i> <sup>2</sup> )], <i>wR</i> ( <i>F</i> <sup>2</sup> ), <i>S</i> | 0.054, 0.160, 1.05                                                                                                                                                                            |
| No. of reflections                                                                                                      | 9732                                                                                                                                                                                          |
| No. of parameters                                                                                                       | 627                                                                                                                                                                                           |
| H-atom treatment                                                                                                        | H-atom parameters constrained                                                                                                                                                                 |
| $\Delta\rho_{\max}$ , $\Delta\rho_{\min}$ (e Å <sup>-3</sup> )                                                          | 0.30, -0.42                                                                                                                                                                                   |

---

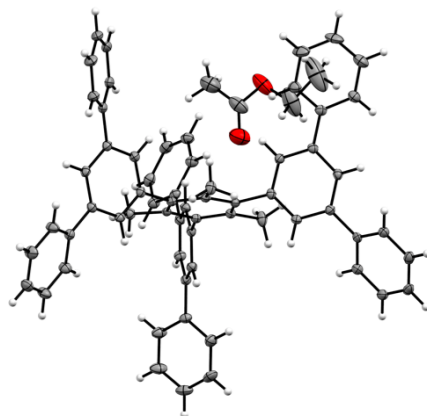

**Supplementary Figure 17.** An ORTEP diagram of **Ph<sup>VDW</sup> • EtOAc** with a probability level of 50 %.

**Supplementary Table 10.** Crystal structure information of **Ph<sup>VDW</sup>•THF**.

---

|                                                                                                                |                                                                                                                                                                                               |
|----------------------------------------------------------------------------------------------------------------|-----------------------------------------------------------------------------------------------------------------------------------------------------------------------------------------------|
| Crystal data                                                                                                   |                                                                                                                                                                                               |
| Chemical formula                                                                                               | 2(C <sub>4</sub> H <sub>8</sub> O)•C <sub>63</sub> H <sub>48</sub>                                                                                                                            |
| <i>M</i> <sub>r</sub>                                                                                          | 949.22                                                                                                                                                                                        |
| Crystal system, space group                                                                                    | Monoclinic, <i>C2/c</i>                                                                                                                                                                       |
| Temperature (K)                                                                                                | 100                                                                                                                                                                                           |
| <i>a</i> , <i>b</i> , <i>c</i> (Å)                                                                             | 16.8279 (3), 12.9634 (2), 24.2308 (4)                                                                                                                                                         |
| β (°)                                                                                                          | 99.885 (2)                                                                                                                                                                                    |
| <i>V</i> (Å <sup>3</sup> )                                                                                     | 5207.40 (15)                                                                                                                                                                                  |
| <i>Z</i>                                                                                                       | 4                                                                                                                                                                                             |
| Radiation type                                                                                                 | Cu <i>K</i> α                                                                                                                                                                                 |
| μ (mm <sup>-1</sup> )                                                                                          | 0.54                                                                                                                                                                                          |
| Crystal size (mm)                                                                                              | 0.37 × 0.31 × 0.13                                                                                                                                                                            |
| Data collection                                                                                                |                                                                                                                                                                                               |
| Diffractometer                                                                                                 | Rigaku XtaLAB Synergy-Custom                                                                                                                                                                  |
| Absorption correction                                                                                          | Multi-scan<br><i>CrysAlis PRO</i> 1.171.41.110a (Rigaku Oxford Diffraction, 2021) Empirical absorption correction using spherical harmonics, implemented in SCALE3 ABSPACK scaling algorithm. |
| <i>T</i> <sub>min</sub> , <i>T</i> <sub>max</sub>                                                              | 0.568, 1.000                                                                                                                                                                                  |
| No. of measured, independent and observed [ <i>I</i> > 2σ( <i>I</i> )] reflections                             | 16182, 5093, 4737                                                                                                                                                                             |
| <i>R</i> <sub>int</sub>                                                                                        | 0.021                                                                                                                                                                                         |
| (sin θ/λ) <sub>max</sub> (Å <sup>-1</sup> )                                                                    | 0.626                                                                                                                                                                                         |
| Refinement                                                                                                     |                                                                                                                                                                                               |
| <i>R</i> [ <i>F</i> <sup>2</sup> > 2σ( <i>F</i> <sup>2</sup> )], <i>wR</i> ( <i>F</i> <sup>2</sup> ), <i>S</i> | 0.042, 0.111, 1.05                                                                                                                                                                            |
| No. of reflections                                                                                             | 5093                                                                                                                                                                                          |
| No. of parameters                                                                                              | 345                                                                                                                                                                                           |
| H-atom treatment                                                                                               | H-atom parameters constrained                                                                                                                                                                 |
| Δρ <sub>max</sub> , Δρ <sub>min</sub> (e Å <sup>-3</sup> )                                                     | 0.40, -0.33                                                                                                                                                                                   |

---

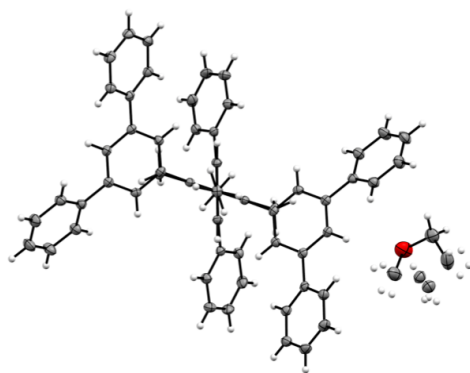

**Supplementary Figure 18.** An ORTEP diagram of **Ph<sup>VDW</sup> • THF** with a probability level of 50 %.

**Supplementary Table 11.** Crystal structure information of **Ph<sup>VDW</sup>•CHCl<sub>3</sub>**.

---

|                                                                                                                |                                                                                                                                                                                                                                                                                             |
|----------------------------------------------------------------------------------------------------------------|---------------------------------------------------------------------------------------------------------------------------------------------------------------------------------------------------------------------------------------------------------------------------------------------|
| Crystal data                                                                                                   |                                                                                                                                                                                                                                                                                             |
| Chemical formula                                                                                               | 2(CHCl <sub>3</sub> )•C <sub>6</sub> H <sub>4</sub> 8                                                                                                                                                                                                                                       |
| <i>M<sub>r</sub></i>                                                                                           | 1043.75                                                                                                                                                                                                                                                                                     |
| Crystal system, space group                                                                                    | Monoclinic, <i>C2/c</i>                                                                                                                                                                                                                                                                     |
| Temperature (K)                                                                                                | 100                                                                                                                                                                                                                                                                                         |
| <i>a</i> , <i>b</i> , <i>c</i> (Å)                                                                             | 16.9997 (4), 13.1549 (3), 23.5266 (5)                                                                                                                                                                                                                                                       |
| β (°)                                                                                                          | 98.076 (2)                                                                                                                                                                                                                                                                                  |
| <i>V</i> (Å <sup>3</sup> )                                                                                     | 5209.1 (2)                                                                                                                                                                                                                                                                                  |
| <i>Z</i>                                                                                                       | 4                                                                                                                                                                                                                                                                                           |
| Radiation type                                                                                                 | Cu <i>K</i> α                                                                                                                                                                                                                                                                               |
| μ (mm <sup>-1</sup> )                                                                                          | 3.33                                                                                                                                                                                                                                                                                        |
| Crystal size (mm)                                                                                              | 0.67 × 0.56 × 0.28                                                                                                                                                                                                                                                                          |
| Data collection                                                                                                |                                                                                                                                                                                                                                                                                             |
| Diffractometer                                                                                                 | Rigaku XtaLAB Synergy-Custom                                                                                                                                                                                                                                                                |
| Absorption correction                                                                                          | Gaussian<br><i>CrysAlis PRO</i> 1.171.41.110a (Rigaku Oxford Diffraction, 2021) Numerical absorption correction based on gaussian integration over a multifaceted crystal model Empirical absorption correction using spherical harmonics, implemented in SCALE3 ABSPACK scaling algorithm. |
| <i>T<sub>min</sub></i> , <i>T<sub>max</sub></i>                                                                | 0.035, 1.000                                                                                                                                                                                                                                                                                |
| No. of measured, independent and observed [ <i>I</i> > 2σ( <i>I</i> )] reflections                             | 14749, 5082, 4638                                                                                                                                                                                                                                                                           |
| <i>R<sub>int</sub></i>                                                                                         | 0.079                                                                                                                                                                                                                                                                                       |
| (sin θ/λ) <sub>max</sub> (Å <sup>-1</sup> )                                                                    | 0.626                                                                                                                                                                                                                                                                                       |
| Refinement                                                                                                     |                                                                                                                                                                                                                                                                                             |
| <i>R</i> [ <i>F</i> <sup>2</sup> > 2σ( <i>F</i> <sup>2</sup> )], <i>wR</i> ( <i>F</i> <sup>2</sup> ), <i>S</i> | 0.090, 0.247, 1.03                                                                                                                                                                                                                                                                          |
| No. of reflections                                                                                             | 5082                                                                                                                                                                                                                                                                                        |
| No. of parameters                                                                                              | 335                                                                                                                                                                                                                                                                                         |
| H-atom treatment                                                                                               | H-atom parameters constrained                                                                                                                                                                                                                                                               |
| Δρ <sub>max</sub> , Δρ <sub>min</sub> (e Å <sup>-3</sup> )                                                     | 0.89, -0.66                                                                                                                                                                                                                                                                                 |

---



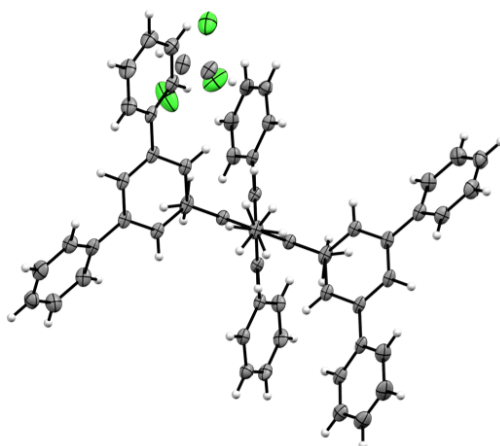

**Supplementary Figure 19.** An ORTEP diagram of  $\text{Ph}^{\text{VDW}} \cdot \text{CHCl}_3$  with a probability level of 50 %.

**Supplementary Table 12.** Crystal structure information of **Ph<sup>VDW</sup>•C<sub>7</sub>H<sub>8</sub>**.

|                                                                                                                         |                                                                                                                                                                                               |
|-------------------------------------------------------------------------------------------------------------------------|-----------------------------------------------------------------------------------------------------------------------------------------------------------------------------------------------|
| Crystal data                                                                                                            |                                                                                                                                                                                               |
| Chemical formula                                                                                                        | C <sub>63</sub> H <sub>48</sub> •C <sub>7</sub> H <sub>8</sub>                                                                                                                                |
| <i>M<sub>r</sub></i>                                                                                                    | 897.14                                                                                                                                                                                        |
| Crystal system, space group                                                                                             | Triclinic, <i>P</i> $\bar{1}$                                                                                                                                                                 |
| Temperature (K)                                                                                                         | 100                                                                                                                                                                                           |
| <i>a</i> , <i>b</i> , <i>c</i> (Å)                                                                                      | 11.2539 (3), 14.5508 (3), 17.3425 (4)                                                                                                                                                         |
| $\alpha$ , $\beta$ , $\gamma$ (°)                                                                                       | 70.210 (2), 78.856 (2), 68.043 (2)                                                                                                                                                            |
| <i>V</i> (Å <sup>3</sup> )                                                                                              | 2471.10 (11)                                                                                                                                                                                  |
| <i>Z</i>                                                                                                                | 2                                                                                                                                                                                             |
| Radiation type                                                                                                          | Cu <i>K</i> $\alpha$                                                                                                                                                                          |
| $\mu$ (mm <sup>-1</sup> )                                                                                               | 0.51                                                                                                                                                                                          |
| Crystal size (mm)                                                                                                       | 0.24 × 0.16 × 0.10                                                                                                                                                                            |
| Data collection                                                                                                         |                                                                                                                                                                                               |
| Diffractometer                                                                                                          | Rigaku XtaLAB Synergy-Custom                                                                                                                                                                  |
| Absorption correction                                                                                                   | Multi-scan<br><i>CrysAlis PRO</i> 1.171.41.110a (Rigaku Oxford Diffraction, 2021) Empirical absorption correction using spherical harmonics, implemented in SCALE3 ABSPACK scaling algorithm. |
| <i>T<sub>min</sub></i> , <i>T<sub>max</sub></i>                                                                         | 0.789, 1.000                                                                                                                                                                                  |
| No. of measured, independent and observed [ <i>I</i> > 2 $\sigma$ ( <i>I</i> )] reflections                             | 29336, 9617, 8981                                                                                                                                                                             |
| <i>R<sub>int</sub></i>                                                                                                  | 0.017                                                                                                                                                                                         |
| ( <i>sin</i> $\theta$ / $\lambda$ ) <sub>max</sub> (Å <sup>-1</sup> )                                                   | 0.626                                                                                                                                                                                         |
| Refinement                                                                                                              |                                                                                                                                                                                               |
| <i>R</i> [ <i>F</i> <sup>2</sup> > 2 $\sigma$ ( <i>F</i> <sup>2</sup> )], <i>wR</i> ( <i>F</i> <sup>2</sup> ), <i>S</i> | 0.045, 0.130, 1.03                                                                                                                                                                            |
| No. of reflections                                                                                                      | 9617                                                                                                                                                                                          |
| No. of parameters                                                                                                       | 722                                                                                                                                                                                           |
| No. of restraints                                                                                                       | 126                                                                                                                                                                                           |
| H-atom treatment                                                                                                        | H-atom parameters constrained                                                                                                                                                                 |
| $\Delta\rho_{\max}$ , $\Delta\rho_{\min}$ (e Å <sup>-3</sup> )                                                          | 0.33, -0.40                                                                                                                                                                                   |

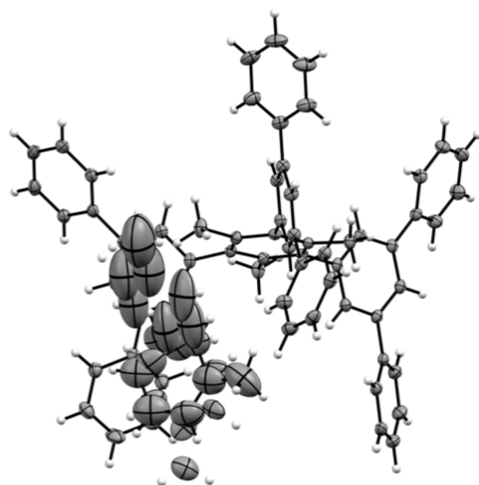

**Supplementary Figure 20.** An ORTEP diagram of  $\text{Ph}^{\text{VDW}} \cdot \text{C}_7\text{H}_8$  with a probability level of 50 %.

**Supplementary Table 13.** Crystal structure information of **Ph<sup>VDW</sup>•CH<sub>2</sub>Cl<sub>2</sub>**.

---

|                                                                                                                         |                                                                                                                                                                                               |
|-------------------------------------------------------------------------------------------------------------------------|-----------------------------------------------------------------------------------------------------------------------------------------------------------------------------------------------|
| Crystal data                                                                                                            |                                                                                                                                                                                               |
| Chemical formula                                                                                                        | C <sub>63</sub> H <sub>48</sub> •1(CH <sub>2</sub> Cl <sub>2</sub> )                                                                                                                          |
| <i>M</i> <sub>r</sub>                                                                                                   | 889.94                                                                                                                                                                                        |
| Crystal system, space group                                                                                             | Triclinic, <i>P</i> $\bar{1}$                                                                                                                                                                 |
| Temperature (K)                                                                                                         | 100                                                                                                                                                                                           |
| <i>a</i> , <i>b</i> , <i>c</i> (Å)                                                                                      | 11.2178 (3), 14.6142 (4), 17.3807 (3)                                                                                                                                                         |
| $\alpha$ , $\beta$ , $\gamma$ (°)                                                                                       | 69.653 (2), 78.471 (2), 67.667 (2)                                                                                                                                                            |
| <i>V</i> (Å <sup>3</sup> )                                                                                              | 2463.65 (11)                                                                                                                                                                                  |
| <i>Z</i>                                                                                                                | 2                                                                                                                                                                                             |
| Radiation type                                                                                                          | Cu <i>K</i> $\alpha$                                                                                                                                                                          |
| $\mu$ (mm <sup>-1</sup> )                                                                                               | 1.48                                                                                                                                                                                          |
| Crystal size (mm)                                                                                                       | 0.22 × 0.05 × 0.03                                                                                                                                                                            |
| Data collection                                                                                                         |                                                                                                                                                                                               |
| Diffractionmeter                                                                                                        | Rigaku XtaLAB Synergy-Custom                                                                                                                                                                  |
| Absorption correction                                                                                                   | Multi-scan<br><i>CrysAlis PRO</i> 1.171.41.110a (Rigaku Oxford Diffraction, 2021) Empirical absorption correction using spherical harmonics, implemented in SCALE3 ABSPACK scaling algorithm. |
| <i>T</i> <sub>min</sub> , <i>T</i> <sub>max</sub>                                                                       | 0.738, 1.000                                                                                                                                                                                  |
| No. of measured, independent and observed [ <i>I</i> > 2 $\sigma$ ( <i>I</i> )] reflections                             | 28682, 9768, 8526                                                                                                                                                                             |
| <i>R</i> <sub>int</sub>                                                                                                 | 0.035                                                                                                                                                                                         |
| ( <i>sin</i> $\theta$ / $\lambda$ ) <sub>max</sub> (Å <sup>-1</sup> )                                                   | 0.626                                                                                                                                                                                         |
| Refinement                                                                                                              |                                                                                                                                                                                               |
| <i>R</i> [ <i>F</i> <sup>2</sup> > 2 $\sigma$ ( <i>F</i> <sup>2</sup> )], <i>wR</i> ( <i>F</i> <sup>2</sup> ), <i>S</i> | 0.056, 0.150, 1.04                                                                                                                                                                            |
| No. of reflections                                                                                                      | 9768                                                                                                                                                                                          |
| No. of parameters                                                                                                       | 653                                                                                                                                                                                           |
| No. of restraints                                                                                                       | 81                                                                                                                                                                                            |
| H-atom treatment                                                                                                        | H-atom parameters constrained                                                                                                                                                                 |
| $\Delta\rho$ <sub>max</sub> , $\Delta\rho$ <sub>min</sub> (e Å <sup>-3</sup> )                                          | 1.01, -0.50                                                                                                                                                                                   |

---

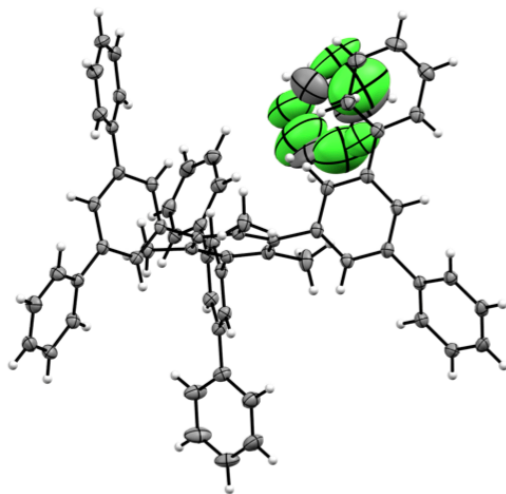

**Supplementary Figure 21.** An ORTEP diagram of  $\text{Ph}^{\text{VDW}} \cdot \text{CH}_2\text{Cl}_2$  with a probability level of 50 %.

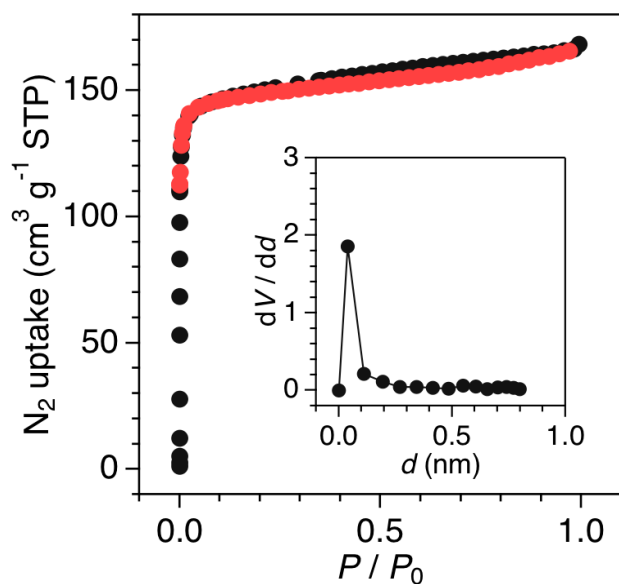

**Supplementary Figure 22.**  $\text{N}_2$  adsorption (black circles) and desorption (red circles) isotherms of  $\text{Py}^{\text{open}} \cdot \text{EtOAc}$  measured at 77 K. The BET surface area of  $\text{Py}^{\text{open}} \cdot \text{EtOAc}$  calculated based on the isotherm is  $597 \text{ cm}^2 \text{ mol}^{-1}$ . Inset represents the pore size distribution of  $\text{Py}^{\text{open}} \cdot \text{EtOAc}$  calculated by means of micropore analysis (MP) method.

**Supplementary Table 14.** Relative permittivity ( $\epsilon$ ) and Hansen parameters<sup>1</sup> of the solvents utilized for the crystallization of **Py<sub>6</sub>Mes**. The  $\epsilon$  and Hansen parameters of the components of **Py<sub>6</sub>Mes** are also listed for reference. <sup>a</sup> The  $\epsilon$  values are obtained from a previous book.<sup>2</sup> <sup>b</sup> The  $\epsilon$  values are obtained from a previous textbook.<sup>3</sup> <sup>c</sup> The  $\epsilon$  values are obtained from a previous article.<sup>4</sup>

| Entry | Crystallization Solvent         | Permittivity       | $\delta_D$ (MPa <sup>0.5</sup> ) | $\delta_P$ (MPa <sup>0.5</sup> ) | $\delta_H$ (MPa <sup>0.5</sup> ) |                     |
|-------|---------------------------------|--------------------|----------------------------------|----------------------------------|----------------------------------|---------------------|
| 1     | MeOH                            | 32.6 <sup>a</sup>  | 15.1                             | 12.3                             | 22.3                             | Poorly soluble      |
| 2     | EtOH                            | 24.3 <sup>a</sup>  | 15.8                             | 8.8                              | 19.4                             |                     |
| 3     | MeCN                            | 37.5 <sup>a</sup>  | 15.3                             | 18.0                             | 6.1                              | Porous Polymorphs   |
| 4     | Butyronitrile                   | 20.3 <sup>a</sup>  | 15.3                             | 12.4                             | 5.1                              |                     |
| 5     | EtOAc                           | 6.02 <sup>a</sup>  | 15.8                             | 5.3                              | 7.2                              |                     |
| 6     | iPA                             | 18.3 <sup>a</sup>  | 15.8                             | 6.1                              | 16.4                             |                     |
| 7     | Acetone                         | 20.7 <sup>a</sup>  | 15.5                             | 10.4                             | 7.0                              |                     |
| 8     | 1-PrCl                          | 7.7 <sup>a</sup>   | 16.0                             | 7.8                              | 2.0                              |                     |
| 9     | 1-BuOH                          | 15.8 <sup>a</sup>  | 16.0                             | 5.7                              | 15.8                             |                     |
| 10    | THF                             | 7.52 <sup>b</sup>  | 16.8                             | 5.7                              | 8.0                              |                     |
| 11    | CHCl <sub>3</sub>               | 4.81 <sup>a</sup>  | 16.8                             | 5.7                              | 8.0                              |                     |
| 12    | Toluene                         | 2.38 <sup>a</sup>  | 18.0                             | 1.4                              | 2.0                              |                     |
| 13    | CH <sub>2</sub> Cl <sub>2</sub> | 9.08 <sup>a</sup>  | 18.2                             | 6.3                              | 6.1                              |                     |
| 14    | DMSO                            | 47.2 <sup>b</sup>  | 18.4                             | 16.4                             | 10.2                             |                     |
| 15    | $\gamma$ -Butyrolactone         | 42.82 <sup>c</sup> | 19.0                             | 16.6                             | 7.4                              |                     |
| 16    | Mesitylene                      | 2.27 <sup>a</sup>  | 18.0                             | 0.0                              | 0.6                              | Py <sub>6</sub> Mes |
| 17    | Benzene                         | 2.27 <sup>a</sup>  | 18.4                             | 0.0                              | 2.0                              |                     |
| 18    | Pyridine                        | 12.3 <sup>a</sup>  | 19.0                             | 8.8                              | 5.9                              |                     |

**Supplementary Table 15.** Summary of PIEDA for **Py<sub>6</sub>Mes** in **Py<sup>open</sup>•MeCN**.

| Crystallographic Axis | $E^{ES}$<br>(kcal/mol) | $E^{CT+mix}$<br>(kcal/mol) | $E^{vdW}$<br>(kcal/mol) | $E^{EX}$<br>(kcal/mol) | $E^{att}$<br>(kcal/mol) | $E^{total}$<br>(kcal/mol) |
|-----------------------|------------------------|----------------------------|-------------------------|------------------------|-------------------------|---------------------------|
| <i>a</i>              | -6.92                  | -4.49                      | -21.24                  | 10.68                  | -32.66                  | -21.97                    |
| <i>b</i>              | -13.66                 | -12.09                     | -47.73                  | 20.97                  | -73.48                  | -52.52                    |
| <i>c</i>              | -11.58                 | -3.88                      | -13.14                  | 8.78                   | -28.60                  | -19.82                    |
| total                 | -32.16                 | -20.46                     | -82.11                  | 40.43                  | -134.73                 | -94.31                    |

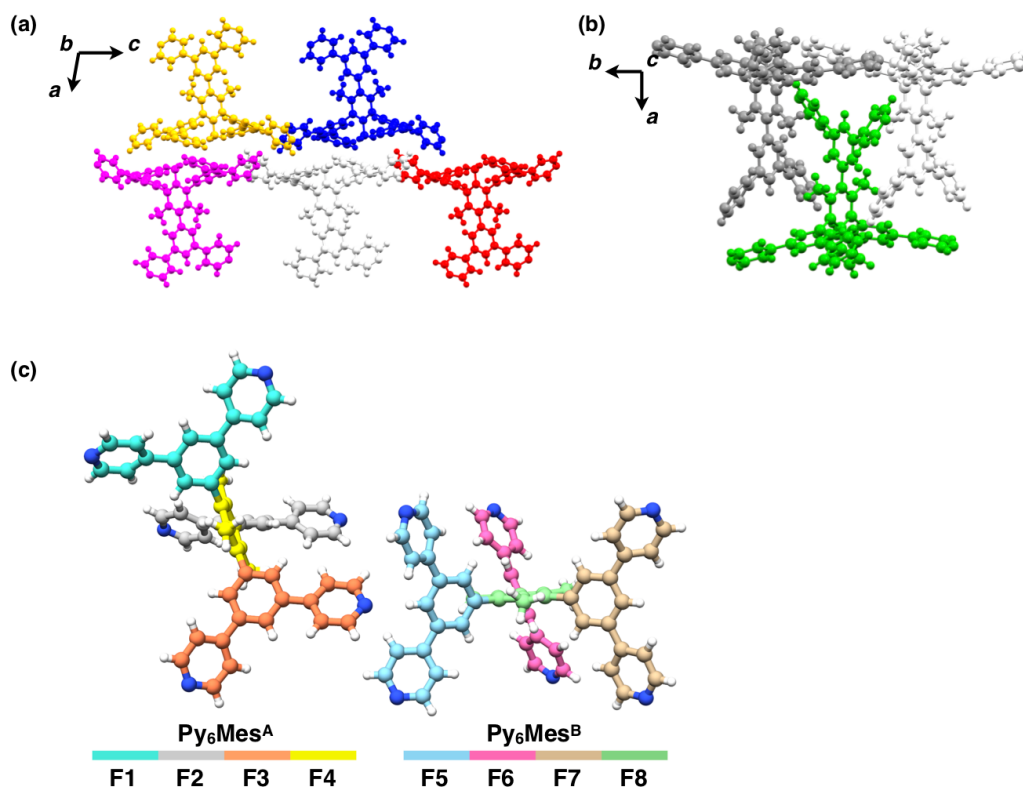

**Supplementary Figure 23.** (a) Symmetrically inequivalent contact pairs of **Py<sub>6</sub>Mes** along the crystallographic *a* (molecules colored in red and pink) and *c* (molecules colored in yellow and blue) axes when focusing on a single molecule of **Py<sub>6</sub>Mes** (colored in white). (b) Symmetrically inequivalent contact pairs of **Py<sub>6</sub>Mes** along the crystallographic *b* (molecules colored in gray and green) axes when focusing on a single molecule of **Py<sub>6</sub>Mes** (colored in white). (c) Fragmentation



of a contact pair of **Py<sub>6</sub>Mes** in **Py<sup>open</sup>•MeCN** (**Py<sub>6</sub>Mes<sup>A</sup>** and **Py<sub>6</sub>Mes<sup>B</sup>**) utilized for the calculation at FMO/RI-MP2 with 6-31+G(d) basis set. Each fragment is stained according to the color strips below.

**Supplementary Table 16.** Summary of calculated total system energies of **Py<sup>open</sup>•MeCN** in a series of organic solvents with different relative permittivity  $\epsilon$ .

| Solvent                        | Vacuum  | Toluene | CHCl <sub>3</sub> | C <sub>2</sub> H <sub>4</sub> Cl <sub>2</sub> | Acetone  | MeOH     |
|--------------------------------|---------|---------|-------------------|-----------------------------------------------|----------|----------|
| $\epsilon$                     | 1       | 2.38    | 4.81              | 10.37                                         | 20.56    | 32.66    |
| Total system energy (kcal/mol) | -94.303 | -101.54 | -101.723          | -101.904                                      | -102.007 | -102.047 |

### 3. Supporting references

- (1) Hansen C. M. in *Hansen Solubility Parameters: A User's Handbook*, Second Edition (CRC Press, 2007).
- (2) Maryott, A.A. & Smith E.R. in *Table of Dielectric Constants of Pure Liquids* (U. S. Government Printing Office, 1951).
- (3) Bradley, J.-C. *et al.* in *Open Notebook Science Challenge: Solubilities of Organic Compounds in Organic Solvents* (Nature Precedings, 2010).
- (4) Fornefeld-Schwarz, U. M. & Svejda, P. Refractive indices and relative permittivities of liquid mixtures of gamma-butyrolactone, gamma-valerolactone, delta-valerolactone, or epsilon-caprolactone plus benzene, plus toluene, or plus ethylbenzene at 293.15 K and 313.15 K and atmospheric pressure. *J. Chem. Eng. Data* **1999**, *44*, 597–604.
